# Supplementary material for: Single source precursor route to nanometric tin chalcogenides
Source: Royal Society of Chemistry journal article supplement (doi:10.1039/d1dt02964a), 2021-01-01
Supplement: d1dt02964a1.pdf [file d1dt02964a1.pdf]

## Supporting Information

### Single Source Precursor Route to Nanometric Tin Chalcogenides

**Veronika Brune**<sup>1,\*</sup>, **Nidal Raydan**<sup>2</sup>, **Anja Sutorius**<sup>1</sup>, **Fabian Hartl**<sup>1</sup>, **Bhagyesh Purohit**<sup>2</sup>, **Sweta Gahlot**<sup>2</sup>, **Pascal Bargiela**<sup>2</sup>, **Laurence Burel**<sup>2</sup>, **Michael Wilhelm**<sup>1</sup>, **Corinna Hegemann**<sup>1</sup>, **Ufuk Atamtürk**<sup>1</sup>, **Sanjay Mathur**<sup>1</sup> and **Shashank Mishra**<sup>2,\*</sup>

<sup>1</sup>University of Cologne, Institute of Inorganic Chemistry, Greinstraße 6, 50939 Cologne, Germany

<sup>2</sup>Université Lyon 1, IRCELYON, CNRS-UMR 5256, 2 Avenue A. Einstein, 69626 Villeurbanne, France

\*Correspondence: [veronika.brune@uni-koeln.de](mailto:veronika.brune@uni-koeln.de) (V.B.); [shashank.mishra@ircelyon.univ-lyon1.fr](mailto:shashank.mishra@ircelyon.univ-lyon1.fr) (S.M.)

**Tab. S1.** Selected cell parameters of **3**, **4**, and **1a**.

| cell parameters                   | complexes                                                                                                     |                                                                                            |                                                                              |
|-----------------------------------|---------------------------------------------------------------------------------------------------------------|--------------------------------------------------------------------------------------------|------------------------------------------------------------------------------|
|                                   | [Sn{(SC <sub>2</sub> H <sub>4</sub> ) <sub>2</sub> NMe} <sub>2</sub> ] <b>3</b>                               | [Sn{(SC <sub>2</sub> H <sub>4</sub> ) <sub>2</sub> NEt} <sub>2</sub> ] <b>4</b>            | [Sn{SEtN(Me)EtS}(Cl)CHCl <sub>2</sub> ] <b>1a</b>                            |
| empirical formulas                | SnS <sub>4</sub> N <sub>2</sub> C <sub>10</sub> H <sub>22</sub>                                               | SnS <sub>4</sub> N <sub>2</sub> C <sub>12</sub> H <sub>26</sub>                            | SnS <sub>2</sub> NCl <sub>3</sub> C <sub>6</sub> H <sub>12</sub>             |
| formula weight                    | 417.97 g/mol                                                                                                  | 445.28 g/mol                                                                               | 387.33 g/mol                                                                 |
| crystal system                    | triclinic                                                                                                     | monoclinic                                                                                 | orthorhombic                                                                 |
| space group                       | $\bar{1}$                                                                                                     | P 2 <sub>1</sub> /n                                                                        | Pca2 <sub>1</sub>                                                            |
| R (int)                           | 0.0986                                                                                                        | 0.0988                                                                                     | 0.2376                                                                       |
| R indices (all data)              | R1 = 0.0856<br>wR2 = 0.1431                                                                                   | R1 = 0.0770<br>wR2 = 0.0881                                                                | R1 = 0.1177<br>wR2 = 0.1527                                                  |
| goodness of fit on F <sup>2</sup> | 1.043                                                                                                         | 0.933                                                                                      | 0.988                                                                        |
| unit cell dimensions              | a = 7.975(1) Å<br>b = 9.827(1) Å<br>c = 11.110(1) Å<br><br>α = 82.131(7)°<br>β = 84.825(7)°<br>γ = 66.447(7)° | a = 10.067(1) Å<br>b = 16.462(1) Å<br>c = 18.821(1) Å<br><br>α = γ = 90°<br>β = 98.650(3)° | a = 16.881(1) Å<br>b = 11.803(1) Å<br>c = 12.555(1) Å<br><br>α = β = γ = 90° |

|        |                         |                         |                        |
|--------|-------------------------|-------------------------|------------------------|
| volume | 789.9(1) Å <sup>3</sup> | 1772.9(1)Å <sup>3</sup> | 2501.28 Å <sup>3</sup> |
| Z      | 2                       | 4                       | 8                      |

**Tab. S2.** selected bond length and angles.

| Bond length [Å] | complexes                                                                       |                                                                                 |                                                   |
|-----------------|---------------------------------------------------------------------------------|---------------------------------------------------------------------------------|---------------------------------------------------|
|                 | [Sn{(SC <sub>2</sub> H <sub>4</sub> ) <sub>2</sub> NMe} <sub>2</sub> ] <b>3</b> | [Sn{(SC <sub>2</sub> H <sub>4</sub> ) <sub>2</sub> NEt} <sub>2</sub> ] <b>4</b> | [Sn{SEtN(Me)EtS}(Cl)CHCl <sub>2</sub> ] <b>1a</b> |
| Sn1-S1          | 2.479(2)                                                                        | 2.464(1)                                                                        | 2.374(5)                                          |
| Sn1-S2          | 2.446(2)                                                                        | 2.432(2)                                                                        | 2.383(5)                                          |
| Sn1-S3          | 2.434(2)                                                                        | 2.225(1)                                                                        |                                                   |
| Sn1-S4          | 2.467(2)                                                                        | 2.459(1)                                                                        |                                                   |
| Sn1-N1          | 2.519(5)                                                                        | 2.579(4)                                                                        | 2.350(1)                                          |
| Sn1-N2          | 2.526(5)                                                                        | 2.570(4)                                                                        |                                                   |
| Sn1-C6          |                                                                                 |                                                                                 | 2.170(1)                                          |
| Sn1-Cl3         |                                                                                 |                                                                                 | 2.430(4)                                          |
| S1-C1           | 1.804(8)                                                                        | 1.807(5)                                                                        | 1.817(1)                                          |
| S2-C2           | 1.814(8)                                                                        |                                                                                 | 1.820(1)                                          |
| S2-C3           |                                                                                 | 1.806(6)                                                                        |                                                   |
| S3-C6           | 1.820(8)                                                                        |                                                                                 |                                                   |
| S3-C7           |                                                                                 | 1.784(5)                                                                        |                                                   |
| S4-C9           | 1.804(7)                                                                        | 1.804(6)                                                                        |                                                   |
| N1-C2           | 1.469(9)                                                                        | 1.465(6)                                                                        | 1.480(1)                                          |
| N1-C4           | 1.477(9)                                                                        | 1.475(6)                                                                        |                                                   |
| N1-C5           | 1.473(8)                                                                        | 1.479(6)                                                                        | 1.490(1)                                          |
| N2-C8           | 1.473(8)                                                                        | 1.477(6)                                                                        |                                                   |
| N2-C10          | 1.476(8)                                                                        | 1.456(6)                                                                        |                                                   |
| N2-C7           | 1.477(9)                                                                        |                                                                                 |                                                   |
| N2-C8           |                                                                                 | 1.477(6)                                                                        |                                                   |
| C1-C2           | 1.515(1)                                                                        | 1.503(7)                                                                        | 1.480(2)                                          |
| C3-C4           | 1.513(1)                                                                        | 1.505(7)                                                                        | 1.480(3)                                          |
| C5-C6           |                                                                                 | 1.510(7)                                                                        |                                                   |
| C6-C7           | 1.492(1)                                                                        |                                                                                 |                                                   |

|            |           |          |          |
|------------|-----------|----------|----------|
| C8-C7      |           | 1.470(8) |          |
| C8-C9      | 1.519(9)  |          |          |
| C9-C10     |           | 1.512(8) |          |
| C11-C12    |           | 1.510(8) |          |
| Cl5-C6     |           |          | 1.790(1) |
| Cl4-C6     |           |          | 1.756(1) |
| angles [°] |           |          |          |
| S1-Sn1-S2  | 109.84(7) | 111.8(1) | 121.2(2) |
| S3-Sn1-S4  | 110.54(7) | 112.0(1) |          |
| N1-Sn1-N2  | 116.12(5) | 117.6(1) |          |
| C6-Sn1-Cl3 |           |          | 121.3(5) |
| N1-Sn1-C6  |           |          | 94.1(6)  |

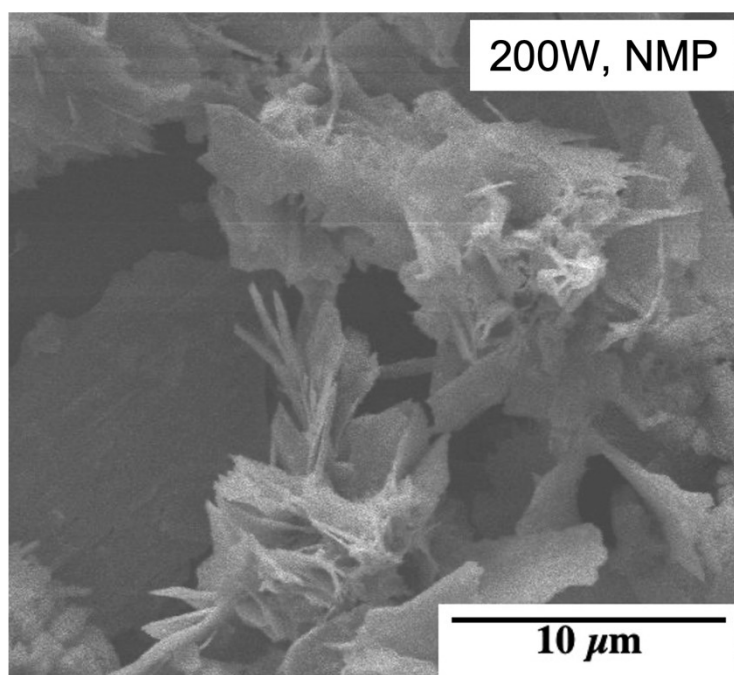

**Fig. S1.** SEM image of microwave deposited SnS flakes from prepared from **1**.

*XPS measurements of microwave deposited precursor  $[Sn\{(SC_2H_4)_2NMe\}_2]$  **3**:*

The quantifications of the XPS measured microwave assisted decomposition compound **3** are in good agreement with the literature [1-4]. From the survey spectra in Fig. S2a the expected Sn (6.7 at.%) and S (20.5 at.%) peaks were observed but also remarkable amounts of carbon (62.1 at.%) and nitrogen (6.3 at.%) were detected. Additionally, a small trace of oxygen (4.4 at%) is also visible. The non-stoichiometric amount of sulfur to tin and the very high

content of carbon indicating remaining ligand fragments at the surface of the  $\text{SnS}_2$  nanoparticles. Therefore, high-resolution spectra of sulfur (S 2p, Fig. S2b), carbon (C 1s, Fig. S1c), and tin (Sn 3d, Fig. S2d.) have been measured. The spectra of S 2p and C 1s show some remaining organic fragments, displayed by the detection of C-S and C-C, C-H bonds and the remaining amount of nitrogen observed from survey scans. These ligand fragments prevent the formed particles from agglomeration, by the repulsing effects of remaining functional groups. The high-resolution spectra of Sn and S show two different tin species, the desired  $\text{SnS}_2$  and the mixed valence  $\text{Sn}_2\text{S}_3$  phase. The observation of partial reduction of the tin center ( $\text{Sn}^{\text{IV}}$  to  $\text{Sn}^{\text{II}}$ ) is in good agreement with before described phenomena of thermodynamically stability of the different tin phases. Consequently, 200 W seemed to be too much power for clean decomposition resulting in pure  $\text{SnS}_2$  particles.

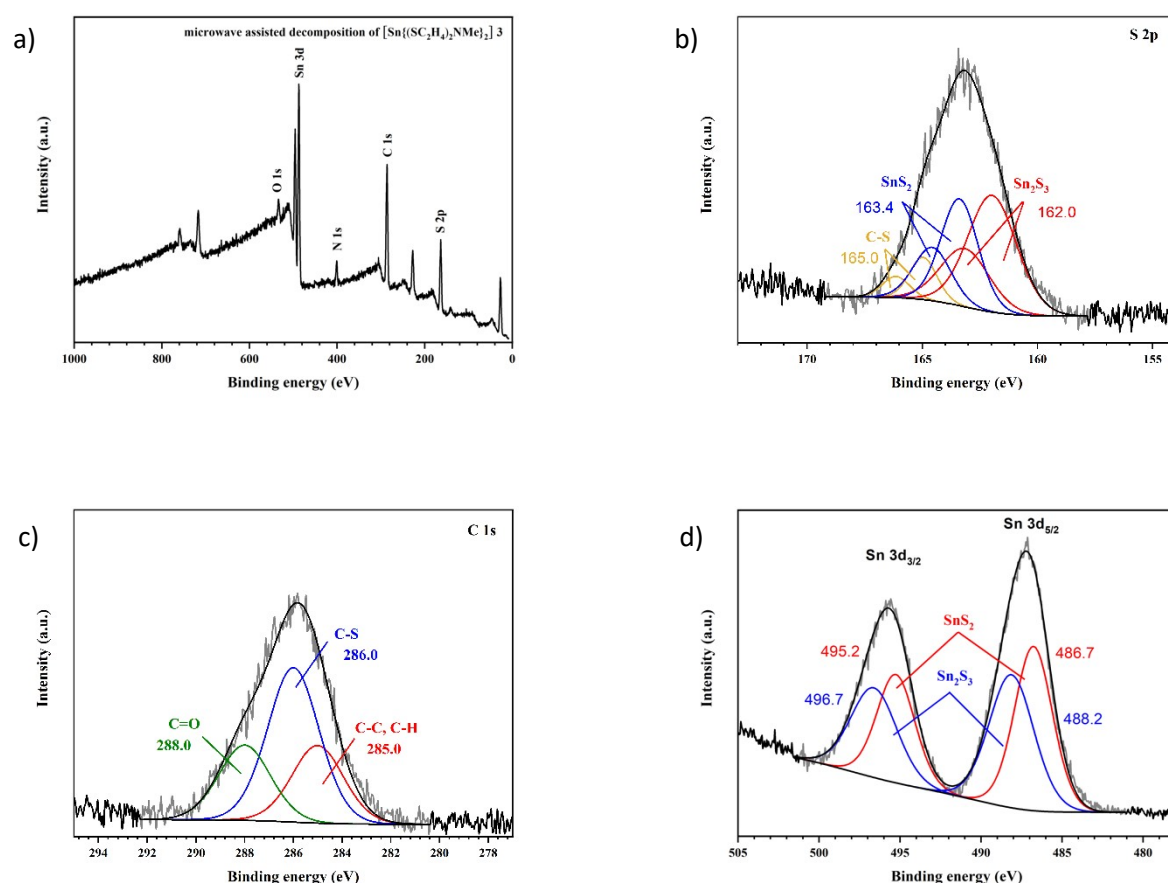

**Fig. S2.** XPS survey (a) and high-resolution (b-d) measurements of microwave assisted decomposition of  $[\text{Sn}\{(\text{SC}_2\text{H}_4)_2\text{NMe}\}_2]_3$ .

The remaining ligand fragments seem to avoid the agglomeration of formed tin particles, resulting from the repulsing effects of ligand fragments of the particle surface (Fig. S3).

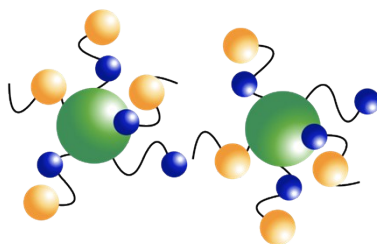

**Fig. S3.** Expected tin sulfide particles with ligands fragments, resulting in separated particles.

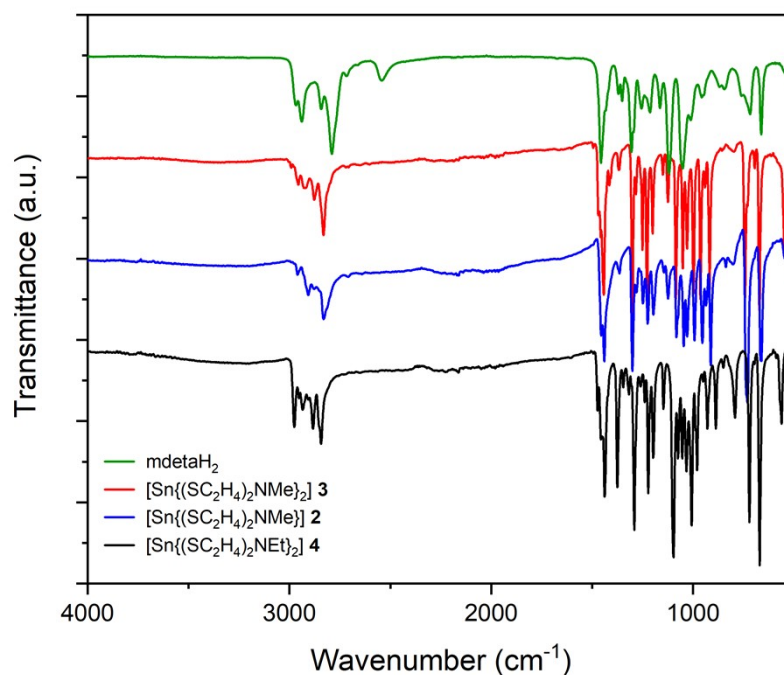

**Fig. S4.** FT-IR spectra of *mdetaH*<sub>2</sub> (green), **2** (blue), **3** (red) and **4** (black): significant bands for *mdetaH*<sub>2</sub>: 2944w (C-H valence vibration), 2794s (R<sup>1</sup>R<sup>2</sup>N-CH<sub>3</sub> vibration), 2557w (S-H valence vibration), for **2**: 2911w (C-H valence vibration), 2835s (R<sup>1</sup>R<sup>2</sup>N-CH<sub>3</sub> vibration), for **3**: 2967w (C-H valence vibration), 2836w (R<sup>1</sup>R<sup>2</sup>N-CH<sub>3</sub> vibration), and for **4**: 2979-2886s (C-H valence vibration), 2846w (R<sup>1</sup>R<sup>2</sup>N-CH<sub>3</sub> and R<sup>1</sup>R<sup>2</sup>N-CH<sub>2</sub>- vibration).

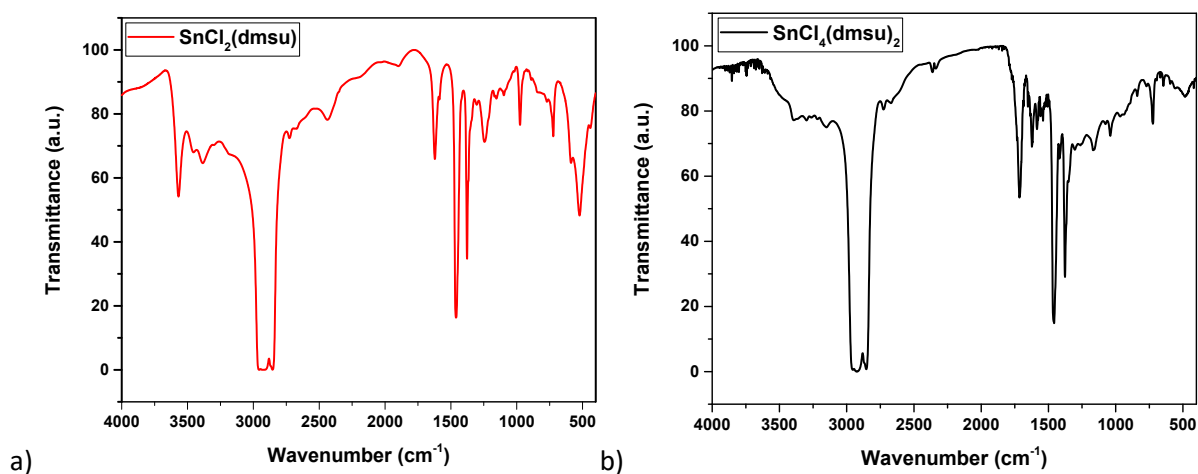

**Fig. S5.** FT-IR spectra of  $[\text{SnCl}_2(\text{dmsu})]$  **5** (a), and  $[\text{SnCl}_4(\text{dmsu})_2]$  **6** (b).

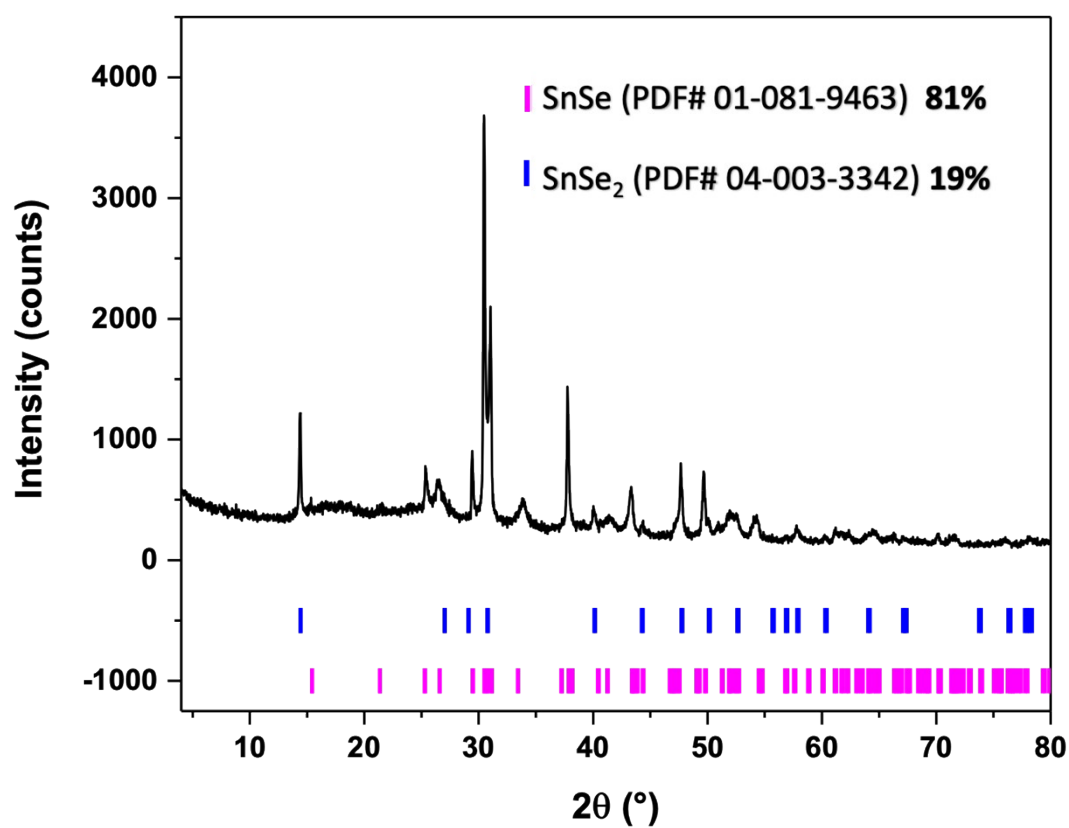

**Fig. S6.** Powder XRD pattern of the residue left at the end of TGA of mixed SnSe and SnSe<sub>2</sub> NPs obtained from the decomposition of **6** in oleic acid alone. It shows that the SnSe<sub>2</sub> content decreases from 61% (in the as-prepared NPs) to 19% (in the residue) due to the loss of Se during heating.

*Material characterization:*

X-ray photoelectron spectroscopy (XPS) measurements were performed by using an ESCA M-Probe Spectrometer from Surface Science Instruments, equipped with a monochromatic Al K $\alpha$  excitation source (1484.4 eV). Survey and high-resolution spectra were referenced to the 284.8 eV for the adventitious carbon signal. After a background correction using a Shirley function, the components were fitted with a Gaussian-Lorentzian GL(30) peak shape. Qualitative and quantitative analyses were done with CasaXPS software (Casa Software Ltd.).

- [1] M. Cruz, J. Morales, J. P. Espinos, J. Sanz, J. Solid State Chem. 2003, 175, 359–365.
- [2] R. Godoy-Rosas, S. Barraza-Félix, R. Ramírez-Bon, R. Ochoa-Landin, H. A. Pineda-León, M. Flores-Acosta, S. G. Ruvalcaba-Manzo, M. C. Acosta-Enriquez, S. J. Castillo, Chalcogenide Lett. 2017, 14, 365–371.
- [3] T. J. Whittles, L. A. Burton, J. M. Skelton, A. Walsh, T. D. Veal, V. R. Dhanak, Chem. Mater. 2016, 28, 3718–3726.
- [4] M. Mirzaee, A. Dolati, J. Sol-Gel Sci. Technol. 2015, 75, 582–592.
